# Supplementary material for: AMP-activated protein kinase-mediated glucose transport as a novel target of tributyltin in human embryonic carcinoma cells
Source: Royal Society of Chemistry journal article supplement (doi:10.1039/c3mt20268b), 2013-01-01
Supplement: c3mt20268b.pdf [file c3mt20268b.pdf]

**(Supplementary figure legends)**

**Fig. S1**

Effect of short-term exposure to TBT on glucose uptake in NT2/D1 cells

After exposure to TBT or TA (100 nM) for 1 h, glucose uptake assay was performed using a fluorescent glucose analog 2-NBDG. The fluorescent intensities of incorporated 2-NBDG were normalized to total cellular protein content. \* $P < 0.05$ .

**Fig. S2**

Effect of PPAR $\gamma$  agonist on glucose uptake in NT2/D1 cells

After treatment with the PPAR $\gamma$  agonist rosiglitazone at different concentration for 24 h, glucose uptake assay was performed using a fluorescent glucose analog 2-NBDG. The fluorescent intensities of incorporated 2-NBDG were normalized to total cellular protein content.
